# Supplementary material
Source: publisher figshare collection journal article supplement (https://diabetesjournals.figshare.com/ndownloader/files/36104414)
Supplement: Supplementary file 1 [file 36104414]

Supplementary table 1 The frequencies of women classified under one of the four groups by ethnicities and HAPO study centers

| Categories  | Numbers of participants | Non-GDM by both IADPSG & NICE | GDM by IADPSG but Non-GDM by NICE | GDM by NICE but Non-GDM by IADPSG | GDM by both IADPSG & NICE |
|-------------|-------------------------|-------------------------------|-----------------------------------|-----------------------------------|---------------------------|
| Overall     | 6544 (100)              | 5037 (77.0)                   | 551 (8.4)                         | 284 (4.3)                         | 672 (10.3)                |
| Ethnicities |                         |                               |                                   |                                   |                           |
| White       | 2583 (39.5)             | 2057 (79.6)                   | 185 (7.2)                         | 120 (4.6)                         | 221(8.6)                  |
| Hispanic    | 1677 (25.6)             | 1193 (71.1)                   | 246 (14.7)                        | 42 (2.5)                          | 197 (11.7)                |
| Asian *     | 1732 (26.5)             | 1354 (78.2)                   | 72 (4.2)                          | 106 (6.1)                         | 200 (11.5)                |
| Black       | 324 (5.0)               | 253 (78.1)                    | 38 (11.7)                         | 4 (1.2)                           | 29 (9.0)                  |
| Other       | 228 (3.5)               | 180 (78.9)                    | 11 (4.8)                          | 12 (5.3)                          | 25 (11.0)                 |
| Centers     |                         |                               |                                   |                                   |                           |
| Bellflower  | 1981 (30.3)             | 1429 (72.1)                   | 281 (14.2)                        | 47 (2.4)                          | 224 (11.3)                |
| Cleveland   | 797 (12.2)              | 563 (70.6)                    | 100 (12.5)                        | 35 (4.4)                          | 99 (12.4)                 |
| Brisbane    | 1444 (22.1)             | 1197 (82.9)                   | 76 (5.3)                          | 68 (4.7)                          | 103 (7.1)                 |
| Newcastle   | 668 (10.2)              | 534 (79.9)                    | 41 (6.1)                          | 32 (4.8)                          | 61 (9.1)                  |
| Hong Kong   | 1654 (25.3)             | 1314 (79.4)                   | 53 (3.2)                          | 102 (6.2)                         | 185 (11.2)                |

Data are expressed as number (%). GDM, gestational diabetes mellitus; IADPSG, International Association of the Diabetes and Pregnancy Study Groups; NICE, National Institute for Health and Care Excellence. \* Over 92% of the Asians in the cohort were Chinese ethnicity.

Supplementary table 2 The baseline characteristics and pregnancy outcomes compared by ethnicities

|                                  | Overall                   | White                                   | Hispanic                                 | Asian <sup>#</sup>                      | Black                                    | P      |
|----------------------------------|---------------------------|-----------------------------------------|------------------------------------------|-----------------------------------------|------------------------------------------|--------|
|                                  | 6397                      | 2551                                    | 1611                                     | 1695                                    | 314                                      |        |
| Maternal characteristics         |                           |                                         |                                          |                                         |                                          |        |
| Age (years)                      | 29.4±5.4                  | 29.3±5.5 <sup>*†‡</sup>                 | 28.8±5.5 <sup>*§  </sup>                 | 30.7±4.9 <sup>†§¶</sup>                 | 26.2±5.6 <sup>‡  ¶</sup>                 | <0.001 |
| Nulliparity                      | 3013 (47.1)               | 1273 (49.9) <sup>*†‡</sup>              | 470 (29.2) <sup>*§  </sup>               | 1026 (60.5) <sup>†§¶</sup>              | 131 (41.7) <sup>‡  ¶</sup>               | <0.001 |
| Smoker                           | 470 (7.3)                 | 386 (15.1) <sup>*†‡</sup>               | 10 (0.62) <sup>*§  </sup>                | 37 (2.2) <sup>†§¶</sup>                 | 18 (5.7) <sup>‡  ¶</sup>                 | <0.001 |
| GA at OGTT (weeks)               | 27.6±1.7                  | 27.9±1.5 <sup>*†‡</sup>                 | 26.9±2.0 <sup>*§  </sup>                 | 27.7±1.4 <sup>†§¶</sup>                 | 27.5±2.0 <sup>‡  ¶</sup>                 | <0.001 |
| GA at birth (weeks)              | 39.5±1.6                  | 39.6±1.7 <sup>*†‡</sup>                 | 39.4±1.6 <sup>*</sup>                    | 39.3±1.5 <sup>†</sup>                   | 39.2±1.9 <sup>‡</sup>                    | <0.001 |
| BMI at OGTT (kg/m <sup>2</sup> ) | 28.2±5.6                  | 29.2±5.7 <sup>*†‡</sup>                 | 29.9±5.3 <sup>*§</sup>                   | 24.6±3.3 <sup>†§  </sup>                | 31.0±7.2 <sup>‡  </sup>                  | <0.001 |
| GH/PE                            | 1015 (16.4)               | 384 (15.6) <sup>*†‡</sup>               | 352 (22.3) <sup>*§  </sup>               | 166 (10.0) <sup>†§¶</sup>               | 85 (29.0) <sup>‡  ¶</sup>                | <0.001 |
| Primary CS                       | 1025 (18.2)               | 434 (19.2) <sup>*</sup>                 | 169 (12.6) <sup>*†</sup>                 | 333 (21.3) <sup>†</sup>                 | 45 (17.0)                                | <0.001 |
| OGTT results                     |                           |                                         |                                          |                                         |                                          |        |
| Fasting (mmol/L) /<br>(mg/dL)    | 4.5±0.39 /<br>(81.2±7.0)  | 4.5±0.38 /<br>(81.1±6.8) <sup>*†‡</sup> | 4.7±0.39 /<br>(83.7±7.1) <sup>*§  </sup> | 4.4±0.34 /<br>(78.8±6.1) <sup>†§¶</sup> | 4.6±0.40 /<br>(82.4±7.2) <sup>‡  ¶</sup> | <0.001 |
| 1-h (mmol/L) /<br>(mg/dL)        | 7.4±1.7 /<br>(135.3±30.1) | 7.5±1.6 /<br>(134.1±28.3) <sup>*†</sup> | 7.6±1.8 /<br>(136.1±32.1) <sup>‡</sup>   | 7.7±1.7 /<br>(137.8±30.4) <sup>*§</sup> | 7.1±1.6 /<br>(127.0±28.8) <sup>†‡§</sup> | <0.001 |

|                                       |                           |                                          |                                         |                                         |                                        |        |
|---------------------------------------|---------------------------|------------------------------------------|-----------------------------------------|-----------------------------------------|----------------------------------------|--------|
| 2-h (mmol/L) /<br>(mg/dL)             | 6.3±1.3 /<br>(113.0±23.2) | 6.2±1.2 /<br>(112.0±22.4) <sup>*†‡</sup> | 6.1±1.3 /<br>(110.4±23.0) <sup>*§</sup> | 6.6±1.3 /<br>(117.9±23.1) <sup>†§</sup> | 5.9±1.4 /<br>(106.8±24.6) <sup>‡</sup> | <0.001 |
| Neonatal outcomes                     |                           |                                          |                                         |                                         |                                        |        |
| Sex (male)                            | 3304 (51.6)               | 1309 (51.3)                              | 814 (50.5)                              | 880 (51.9)                              | 182 (58.0)                             | 0.112  |
| Birth weight (g) <sup>#</sup>         | 3378±525                  | 3486±537 <sup>*†‡</sup>                  | 3448±513 <sup>*§  </sup>                | 3176±437 <sup>†§  </sup>                | 3243±575 <sup>‡  ¶</sup>               | <0.001 |
| LGA <sup>#</sup>                      | 608 (9.5)                 | 244 (9.6)                                | 152 (9.4)                               | 161 (9.5)                               | 27 (8.6)                               | 0.957  |
| Body fat (%) <sup>#</sup>             | 11.6±3.6                  | 12.1±3.5 <sup>*†</sup>                   | 12.7±3.5 <sup>*‡§</sup>                 | 10.0±3.3 <sup>†§  </sup>                | 11.6±3.8 <sup>‡  </sup>                | <0.001 |
| Adiposity <sup>#</sup>                | 498 (9.6)                 | 190 (9.5)                                | 119 (9.8)                               | 146 (9.5)                               | 22 (9.6)                               | 0.999  |
| Clinical hypoglycemia <sup>**††</sup> | 102 (1.6)                 | 30 (1.2) <sup>*†</sup>                   | 4 (0.25) <sup>*‡</sup>                  | 63 (3.7) <sup>†‡§</sup>                 | 1 (0.32) <sup>§</sup>                  | <0.001 |
| Hyperinsulinemia <sup>**</sup>        | 492 (8.7)                 | 181 (8.8)                                | 143 (9.5)                               | 128 (7.8)                               | 24 (9.5)                               | 0.368  |

Continuous variables are expressed as mean ± SD, and compared by using Kruskal-Wallis test. Categorical variables are expressed as numbers (%), and compared by Chi-square test, except for <sup>††</sup> by Fisher's exact test. Post-hoc pairwise comparisons were corrected by Wilcoxon test and false discovery rate, respectively.

BMI, body mass index; CS, caesarean section; GA, gestational age; GDM, gestational diabetes mellitus; GH/PE, gestational hypertension / preeclampsia; IADPSG, International Association of the Diabetes and Pregnancy Study Groups; LGA, large for gestational age; NICE, National Institute for Health and Care Excellence; OGTT, oral glucose tolerance test. Body fat is available in 5154 (80.6%) of the participants.

<sup>\*†‡§||¶</sup> P<0.05. <sup>#</sup> Over 92% of the Asians in the cohort were Chinese ethnicity. <sup>\*\*</sup> Missing data were excluded.

Supplementary table 3 Incidences of adverse pregnancy outcomes in women with GDM by IADPSG and NICE criteria, respectively, in each ethnicity

|                           | Overall       |             | White         |             | Hispanic      |             | Asian <sup>†</sup> |             | Black         |             |
|---------------------------|---------------|-------------|---------------|-------------|---------------|-------------|--------------------|-------------|---------------|-------------|
|                           | GDM by IADPSG | GDM by NICE | GDM by IADPSG | GDM by NICE | GDM by IADPSG | GDM by NICE | GDM by IADPSG      | GDM by NICE | GDM by IADPSG | GDM by NICE |
|                           | 1101 (17.2)   | 835 (13.1)  | 378 (14.8)    | 313 (12.3)  | 379 (23.5)    | 177 (11.0)  | 249 (14.7)         | 283 (16.7)  | 61 (19.4)     | 27 (8.6)    |
| Maternal adverse outcomes |               |             |               |             |               |             |                    |             |               |             |
| GH/PE                     | 249 (24.8)    | 152 (20.3)  | 87 (24.7)     | 70 (24.0)   | 110 (30.1)    | 48 (28.1)   | 33 (14.1)          | 29 (10.9)   | 19 (35.8)     | 5 (26.3)    |
| Primary CS                | 217 (23.5)    | 173 (23.7)  | 87 (26.1)     | 78 (27.8)   | 54 (17.8)     | 23 (16.1)   | 53 (24.8)          | 59 (23.5)   | 16 (34.0)     | 9 (37.5)    |
| Neonatal outcomes         |               |             |               |             |               |             |                    |             |               |             |
| LGA *                     | 176 (16.0)    | 119 (14.3)  | 59 (15.6)     | 39 (12.5)   | 60 (15.8)     | 26 (14.7)   | 36 (14.6)          | 40 (14.2)   | 14 (23.0)     | 8 (29.6)    |
| Adiposity *               | 138 (16.0)    | 93 (14.0)   | 44 (15.2)     | 28 (11.7)   | 41 (14.5)     | 14 (10.5)   | 34 (15.7)          | 40 (16.2)   | 11 (25.0)     | 3 (25.0)    |
| Hypoglycemia *            | 23 (2.1)      | 21 (2.5)    | 7 (1.9)       | 9 (2.9)     | 1 (0.27)      | 0           | 13 (5.2)           | 11(3.9)     | 1 (1.6)       | 0           |
| Hyperinsulinemia *        | 160 (16.3)    | 123 (16.8)  | 49 (16.3)     | 43 (17.3)   | 58 (15.9)     | 25 (15.0)   | 39 (16.4)          | 44 (16.2)   | 10 (19.2)     | 6 (30)      |

Data are expressed as numbers (%).

GDM, gestational diabetes mellitus; IADPSG, International Association of the Diabetes and Pregnancy Study Groups; NICE, National Institute for Health and Care Excellence.; GH/PE, gestational hypertension / preeclampsia; CS, caesarean section; LGA, large for gestational age.

\* Missing data were excluded. <sup>†</sup> Over 92% of the Asians in the cohort were Chinese ethnicity

Supplementary table 4 Associations of GDM diagnosed by the IADPSG and NICE criteria with adverse pregnancy outcomes among all women whose OGTT remained blinded (n= 6397)

|                           | Unadjusted                    |        |                               |        | Adjusted                      |        |                               |        |                               |        |                               |        |
|---------------------------|-------------------------------|--------|-------------------------------|--------|-------------------------------|--------|-------------------------------|--------|-------------------------------|--------|-------------------------------|--------|
|                           |                               |        |                               |        | Model 1                       |        |                               |        | Model 2                       |        |                               |        |
|                           | IADPSG                        |        | NICE                          |        | IADPSG                        |        | NICE                          |        | IADPSG                        |        | NICE                          |        |
|                           | OR (95% CI)                   | AIC    |
| Maternal adverse outcomes |                               |        |                               |        |                               |        |                               |        |                               |        |                               |        |
| GH/PE                     | 1.91 (1.62-2.24) <sup>§</sup> | 5474.2 | 1.34 (1.11-1.62) <sup>‡</sup> | 5523.5 | 1.73 (1.46-2.05) <sup>§</sup> | 5161.6 | 1.47 (1.20-1.79) <sup>§</sup> | 5186.2 | 1.31 (1.10-1.58) <sup>‡</sup> | 4888.5 | 1.32 (1.07-1.62) <sup>*</sup> | 4890.6 |
| Primary CS                | 1.48 (1.25-1.75) <sup>§</sup> | 5329.3 | 1.48 (1.22-1.78) <sup>§</sup> | 5332.8 | 1.54 (1.28-1.85) <sup>§</sup> | 4909.6 | 1.33 (1.09-1.62) <sup>‡</sup> | 4922.7 | 1.24 (1.02-1.50) <sup>*</sup> | 4788.5 | 1.15 (0.93-1.40)              | 4791.6 |
| Neonatal adverse outcomes |                               |        |                               |        |                               |        |                               |        |                               |        |                               |        |
| LGA                       | 2.14 (1.77-2.58) <sup>§</sup> | 3961.2 | 1.73 (1.39-2.14) <sup>§</sup> | 3995.6 | 2.22 (1.83-2.70) <sup>§</sup> | 3977.6 | 1.74 (1.40-2.17) <sup>§</sup> | 4014.5 | 2.08 (1.69-2.55) <sup>§</sup> | 3844.1 | 1.86 (1.48-2.33) <sup>§</sup> | 3864.1 |
| Adiposity                 | 2.09 (1.69-2.58) <sup>§</sup> | 3236.7 | 1.65 (1.29-2.09) <sup>§</sup> | 3264.1 | 2.26 (1.81-2.80) <sup>§</sup> | 3245.2 | 1.75 (1.36-2.23) <sup>§</sup> | 3276.5 | 1.99 (1.58-2.50) <sup>§</sup> | 3206.8 | 1.72 (1.33-2.21) <sup>§</sup> | 3223.6 |
| Clinical hypoglycemia     | 1.41 (0.86-2.22)              | 1048.1 | 1.74 (1.05-2.78) <sup>*</sup> | 1045.5 | 1.80 (1.09-2.88) <sup>*</sup> | 976.5  | 1.52 (0.90-2.46)              | 979.1  | 1.66 (1.00-2.73) <sup>*</sup> | 978.1  | 1.41 (0.83-2.31)              | 980.1  |

|                  |                                   |        |                                   |        |                                   |        |                                   |        |                                   |        |                                   |        |
|------------------|-----------------------------------|--------|-----------------------------------|--------|-----------------------------------|--------|-----------------------------------|--------|-----------------------------------|--------|-----------------------------------|--------|
| Hyperinsulinemia | 2.54 (2.07-<br>3.11) <sup>§</sup> | 3268.1 | 2.47 (1.97-<br>3.07) <sup>§</sup> | 3284.7 | 2.41 (1.95-<br>2.97) <sup>§</sup> | 3242.8 | 2.42 (1.92-<br>3.03) <sup>§</sup> | 3252.7 | 2.10 (1.68-<br>2.60) <sup>§</sup> | 3223.8 | 2.21 (1.75-<br>2.78) <sup>§</sup> | 3224.6 |
|------------------|-----------------------------------|--------|-----------------------------------|--------|-----------------------------------|--------|-----------------------------------|--------|-----------------------------------|--------|-----------------------------------|--------|

---

Model 1 was adjusted for maternal age, parity, ethnicity and study center. Model 2 was adjusted for covariates in model 1 plus maternal height, body-mass index and gestational age at OGTT, smoking status, alcohol use, maternal urinary tract infection (for GH/PE only), hospitalization before delivery and mean arterial pressure at OGTT (except for GH/PE), family history of diabetes and baby's sex.

OR, odds ratio; CI, confidence interval; AIC, Akaike information criterion; GH/PE, gestational hypertension / preeclampsia; CS, caesarean section; LGA, large for gestational age. \*P<0.05; †P<0.01; ‡P<0.005, §P<0.00

Supplementary table 5 Associations of women being GDM diagnosed by the IADPSG or NICE criteria with adverse pregnancy outcomes in Blacks (n = 314)

|                   | Unadjusted                     |       |                                |       | Adjusted                       |       |                                |       |                                |       |                                |       |
|-------------------|--------------------------------|-------|--------------------------------|-------|--------------------------------|-------|--------------------------------|-------|--------------------------------|-------|--------------------------------|-------|
|                   |                                |       |                                |       | Model 1                        |       |                                |       | Model 2                        |       |                                |       |
|                   | IADPSG                         |       | NICE                           |       | IADPSG                         |       | NICE                           |       | IADPSG                         |       | NICE                           |       |
|                   | OR (95% CI)                    | AIC   |
| Maternal outcomes |                                |       |                                |       |                                |       |                                |       |                                |       |                                |       |
| GH/PE             | 1.47 (0.79-2.76)               | 355.5 | 0.87 (0.30-2.48)               | 356.8 | 1.87 (0.91-3.85)               | 344.3 | 0.89 (0.29-2.71)               | 347.1 | 1.21 (0.55-2.69)               | 336.6 | 0.69 (0.21-2.31)               | 336.4 |
| Primary CS        | 3.36 (1.62-6.87) <sup>§</sup>  | 235.2 | 3.42 (1.35-8.29) <sup>†</sup>  | 239.0 | 3.12 (1.35-7.19) <sup>†</sup>  | 223.7 | 3.60 (1.29-9.89) <sup>*</sup>  | 224.8 | 2.31 (0.92-5.75)               | 217.7 | 5.47 (1.74-17.50) <sup>‡</sup> | 212.7 |
| Neonatal outcomes |                                |       |                                |       |                                |       |                                |       |                                |       |                                |       |
| LGA               | 5.48 (2.41-12.55) <sup>§</sup> | 172.1 | 5.92 (2.20-15.00) <sup>§</sup> | 176.6 | 4.43 (1.81-10.98) <sup>‡</sup> | 175.5 | 4.64 (1.65-12.33) <sup>‡</sup> | 177.9 | 6.47 (2.30-19.26) <sup>§</sup> | 167.6 | 4.13 (1.27-12.95) <sup>*</sup> | 174.6 |
| Adiposity         | 5.15 (2.05-13.02) <sup>§</sup> | 136.4 | 3.40 (0.71-12.57)              | 145.6 | 7.31 (2.33-25.01) <sup>§</sup> | 129.7 | 2.78 (0.51-12.08)              | 139.8 | 9.19 (2.61-36.82) <sup>§</sup> | 143.5 | 3.05 (0.51-14.97)              | 154.1 |
| Hyperinsulinemia  | 3.16 (1.28-7.57) <sup>*</sup>  | 156.4 | 5.10 (1.64-14.46) <sup>‡</sup> | 155.0 | 3.10 (1.14-8.31) <sup>*</sup>  | 161.2 | 5.10 (1.55-15.75) <sup>†</sup> | 159.2 | 2.54 (0.87-7.28)               | 161.4 | 4.06 (1.08-14.16) <sup>*</sup> | 160.0 |

Model 1 was adjusted for maternal age, parity, ethnicity and study center. Model 2 was adjusted for covariates in model 1 plus maternal height, body-mass index and gestational age at OGTT, smoking status, alcohol use, maternal urinary tract infection (for GH/PE only), hospitalization before delivery and mean arterial pressure at OGTT (except for GH/PE), family history of diabetes and baby's sex.

OR, odds ratio; CI, confidence interval; AIC, Akaike information criterion; GH/PE, gestational hypertension / preeclampsia; CS, caesarean section; LGA, large for gestational age. \*P<0.05; †P<0.01; ‡P<0.005, §P<0.001.



Supplementary figure 1 Comparisons of the frequencies of GDM by ethnicities based on the IADPSG and NICE criteria respectively.

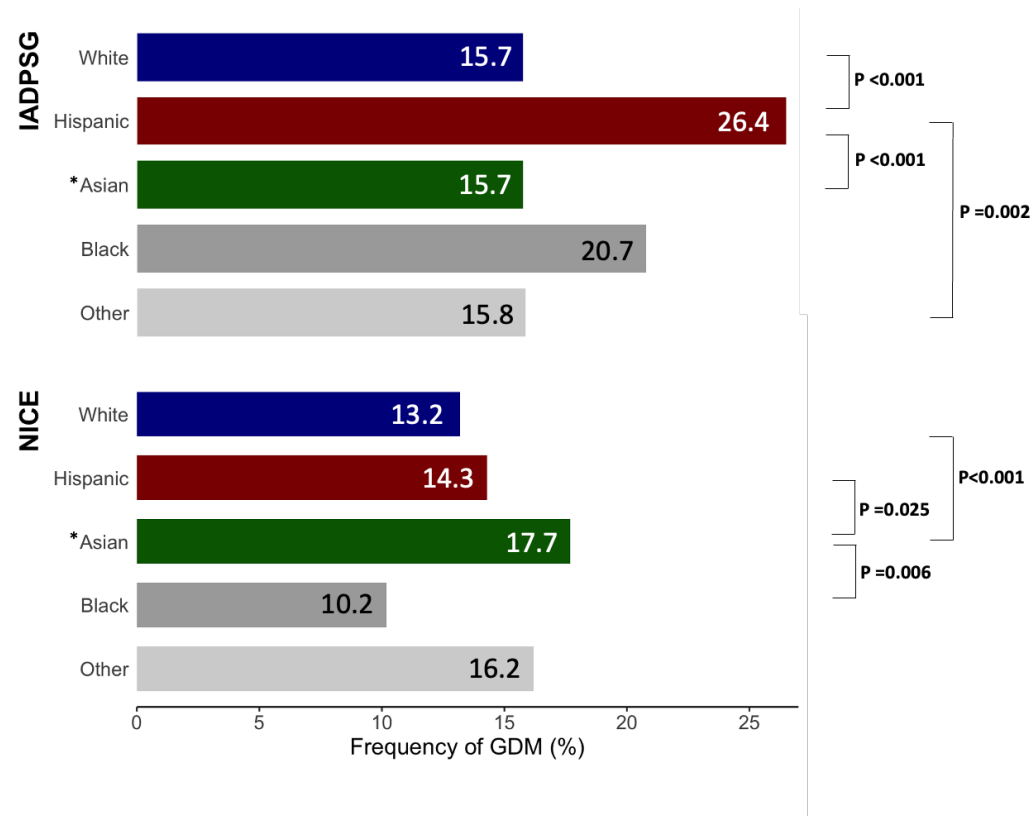

Numbers represent percentage of women diagnosed with GDM; the frequencies were compared by Chi-square test. Post-hoc pairwise comparisons were corrected by false discovery rate. GDM, gestational diabetes mellitus; IADPSG, International Association of the Diabetes and Pregnancy Study Groups; NICE, National Institute for Health and Care Excellence. \* Over 92% of the Asians in the cohort were Chinese ethnicity.
